# Supplementary material
Source: publisher site journal article supplement (https://www.dovepress.com/article/309725)
Supplement: Supplementary file 1 [file get_supplementary_file.php]

**supplementary Table 1** Differentially Expressed Proteins in the Screening Set

| **Unique ID** | **Protein Name** | **Fold Change** | ***P*** |
| --- | --- | --- | --- |
| P05154 | Serpin Family A Member 5 | 2.06 | 0.015 |
| P02679 | fibrinogen gamma chain | 2.05 | 0.019 |
| A4QNT7 | soluble fms-like tyrosine kinase 1 | 2.03 | 0.049 |
| Q9UHV8 | Galectin | 1.95 | 0.065 |
| P10909 | Clusterin | 1.91 | 0.034 |
| P05783 | Cytokeratin 18 | 1.88 | 0.036 |
| P05362 | Intercellular adhesion molecule 1 | 1.83 | 0.026 |
| A0A0K0Q2Z1 | Serpin peptidase inhibitor, clade C, member 1 | 1.80 | 0.064 |
| P01019 | Angiotensinogen | 1.77 | 0.055 |
| P02751 | Fibronectin | 1.74 | 0.070 |
| P17813 | Endoglin | 1.74 | 0.032 |
| P08697 | Alpha-2-antiplasmin | 1.73 | 0.071 |
| Q01433 | AMP deaminase 2 | 1.72 | 0.012 |
| Q00888 | Pregnancy-specific beta-1-glycoprotein 4 | 1.71 | 0.009 |
| P19320 | Vascular cell adhesion protein 1 | 1.58 | <0.001 |
| P35858 | Insulin-like growth factor-binding protein complex acid labile subunit | 1.54 | 0.024 |
| P04083 | Annexin A1 | 1.51 | 0.006 |
| P43652 | Afamin | 1.45 | 0.018 |
| P02787 | Serotransferrin | 1.45 | 0.012 |
| P55056 | Apolipoprotein C-IV | 1.42 | 0.088 |
| Q16401 | 26S proteasome non-ATPase regulatory subunit 5 | 1.38 | 0.022 |
| P0DN86 | Choriogonadotropin subunit beta | 1.37 | 0.009 |
| Q08380 | Galectin 3 binding protein | 1.35 | 0.045 |
| P00915 | Carbonic anhydrase 1 | 1.34 | 0.043 |
| P00747 | Plasminogen | 1.33 | 0.075 |
| P05387 | 60S acidic ribosomal protein P2 | 1.32 | 0.088 |
| Q00887 | Pregnancy-specific beta-1-glycoprotein 9 | 1.31 | 0.009 |
| P20742 | Pregnancy zone protein | 1.29 | 0.024 |
| P39023 | 60S ribosomal protein L3 | 1.29 | 0.012 |
| P00742 | Coagulation factor X | 1.29 | 0.047 |
| P07358 | Complement component C8 b chain | 1.29 | 0.022 |
| P35232 | Prohibitin | 1.28 | 0.087 |
| Q9BXR6 | Complement factor H-related protein 5 | 1.28 | 0.100 |
| Q14315 | Filamin-C | 1.27 | 0.005 |
| P0C0L5 | Complement C4 beta binding protein | 1.26 | 0.021 |
| P80188 | neutrophil gelatinase-associated lipocalin | 1.26 | 0.066 |
| P22891 | Vitamin K-dependent protein Z | 1.25 | 0.018 |
| P05019 | Insulin-like growth factor I | 1.25 | 0.010 |
| O00592 | Podocalyxin | 1.23 | 0.007 |
| P15090 | fatty acid-binding protein 4 | 1.22 | 0.005 |
| P62942 | Peptidyl-prolyl cis-trans isomerase FKBP1A | 1.21 | 0.009 |
| P05231 | Interleukin-6 | 1.20 | 0.010 |
| P58876 | Histone H2B type 1-D | 1.20 | 0.009 |
| P19827 | Inter-a inhibitor H1 | 1.20 | 0.011 |
| P68871 | Hemoglobin subunit beta | 1.20 | 0.012 |
| P01011 | alpha-1-antichymotrypsin | 1.19 | 0.039 |
| Q14766 | Latent-transforming growth factor beta-binding | 1.18 | 0.004 |
| P02760 | AMBP protein | 1.18 | 0.022 |
| P14550 | Aldo-keto reductase family 1 member A1 | 1.18 | 0.047 |
| Q9NVS9 | Pyridoxine-5'-phosphate oxidase | 1.18 | 0.035 |
| Q9Y6V0 | Protein piccolo | 1.17 | 0.010 |
| P00746 | Complement factor D preproprotein | 1.17 | 0.015 |
| P04792 | Heat shock protein beta-1 | 1.16 | 0.011 |
| P06681 | Complement C2 | 1.16 | 0.008 |
| P02748 | Complement component C9 | 1.16 | 0.060 |
| P08758 | Annexin A5 | 1.16 | 0.081 |
| P39060 | Collagen alpha-1(XVIII) chain | 1.15 | 0.003 |
| P02775 | Platelet basic protein | 1.15 | 0.090 |
| Q9NQ30 | Endothelial cell-specific molecule 1 | 1.15 | 0.042 |
| Q15181 | Inorganic pyrophosphatase | 1.15 | 0.076 |
| P02753 | Plasma retinol-binding protein | 1.15 | 0.030 |
| P01215 | Glycoprotein hormones alpha chain | 1.15 | 0.028 |
| Q15437 | Protein transport protein Sec23B | 1.14 | 0.029 |
| Q06033 | Inter-a inhibitor H3 | 1.14 | 0.008 |
| P11464 | Pregnancy-specific beta-1-glycoprotein 1 | 1.14 | 0.022 |
| P04278 | Sex hormone-binding globulin | 1.13 | 0.024 |
| P34998 | Corticotropin-releasing factor receptor 1 | 1.13 | 0.074 |
| P25054 | Adenomatous polyposis coli protein | 1.12 | 0.029 |
| P12109 | COL6A1 Collagen alpha-1(VI) chain | 1.12 | 0.010 |
| B7ZKJ8 | ITIH4 protein | 1.12 | 0.011 |
| P28331 | NADH-ubiquinone oxidoreductase | 1.12 | 0.032 |
| P00450 | Ceruloplasmin | 1.12 | 0.084 |
| P80404 | 4-aminobutyrate aminotransferase, mitochondrial | 1.12 | 0.011 |
| P27169 | Paraoxonase 1 | 1.12 | 0.023 |
| P08567 | Pleckstrin | 1.11 | 0.039 |
| P10643 | Complement C7 | 1.11 | 0.083 |
| Q14258 | E3 ubiquitin/ISG15 ligase TRIM25 | 1.11 | 0.014 |
| Q99598 | Translin-associated protein X | 1.11 | 0.099 |
| P05305 | endothelin-1 | 1.11 | 0.049 |
| P02656 | Apolipoprotein C III | 1.11 | 0.008 |
| P08519 | Apolipoprotein(a) | 1.11 | 0.094 |
| P04196 | Histidine-rich glycoprotein | 1.10 | 0.009 |
| P60174 | Triosephosphate isomerase | 0.91 | 0.086 |
| P14151 | L-selectin | 0.91 | 0.010 |
| P05062 | Fructose-bisphosphate aldolase B | 0.91 | 0.094 |
| P69905 | Haemoglobin subunit alpha | 0.91 | 0.055 |
| P98095 | Fibulin-2 | 0.91 | 0.013 |
| Q9Y2Q3 | Glutathione S-transferase kappa 1 | 0.90 | 0.006 |
| P18283 | Glutathione peroxidase 2 | 0.90 | 0.048 |
| Q96C23 | Aldose 1-epimerase | 0.90 | 0.076 |
| P02652 | Apolipoprotein A-II | 0.89 | 0.018 |
| Q86X76 | Nitrilase homolog 1 | 0.89 | 0.088 |
| P50914 | 60S ribosomal protein L14 | 0.89 | 0.067 |
| P07814 | Bifunctional aminoacyl-tRNA synthetase | 0.89 | 0.044 |
| Q63HM1 | Probable arylformamidase | 0.89 | 0.030 |
| P38646 | Stress-70 protein, mitochondrial | 0.89 | 0.015 |
| P16152 | Carbonyl reductase [NADPH] 1 | 0.89 | 0.093 |
| P99999 | Cytochrome c | 0.88 | 0.011 |
| P15880 | 40S ribosomal protein S2 | 0.88 | 0.050 |
| Q15274 | Nicotinate-nucleotide pyrophosphorylase [carboxylating] | 0.88 | 0.009 |
| Q27J81 | Inverted formin-2 | 0.88 | 0.008 |
| P06276 | Cholinesterase precursor | 0.88 | 0.003 |
| P62070 | Ras-related protein R-Ras2 | 0.88 | 0.025 |
| Q99424 | Peroxisomal acyl-coenzyme A oxidase 2 | 0.87 | 0.027 |
| Q8WZ75 | Roundabout homologue 4 | 0.87 | 0.067 |
| P35542 | Serum amyloid A-4 protein | 0.87 | 0.066 |
| P25311 | Zinc-alpha-2-glycoprotein | 0.87 | 0.063 |
| Q8IUZ5 | Alanine--glyoxylate aminotransferase 2-like 2 | 0.87 | 0.004 |
| P55058 | Phospholipid transfer protein | 0.87 | 0.012 |
| P02747 | Complement C1q subcomponent subunit C | 0.87 | 0.072 |
| Q9UJM8 | Hydroxyacid oxidase 1 | 0.87 | 0.028 |
| P26885 | Peptidyl-prolyl cis-trans isomerase FKBP2 | 0.87 | 0.047 |
| Q14449 | Growth factor receptor-bound protein 14 | 0.86 | 0.042 |
| Q14032 | Bile acid-CoA:amino acid N-acyltransferase | 0.86 | 0.091 |
| P07478 | Trypsin-2 | 0.86 | 0.018 |
| Q13822 | Ectonucleotide pyrophosphatase | 0.86 | 0.009 |
| P00740 | Coagulation factor IX | 0.85 | 0.003 |
| P02774 | Vitamin D binding protein | 0.85 | 0.023 |
| P02745 | Complement C1q subcomponent subunit A | 0.85 | 0.054 |
| P00488 | F13A1 coagulation factor XIII A1 subunit precursor | 0.85 | 0.008 |
| P07902 | Galactose-1-phosphate uridylyltransferase | 0.85 | 0.065 |
| P02765 | Alpha-2-HS-glycoprotein | 0.84 | 0.009 |
| Q9Y2D5 | A-kinase anchor protein 2 | 0.83 | 0.074 |
| P47897 | Glutaminyl-tRNA synthetase | 0.83 | 0.056 |
| P04004 | Vitronectin | 0.82 | 0.013 |
| P51570 | Galactokinase | 0.82 | 0.072 |
| P28332 | Alcohol dehydrogenase 6 | 0.82 | 0.077 |
| P49747 | Cartilage oligomeric matrix protein | 0.82 | 0.090 |
| P62241 | 40S ribosomal protein S8 | 0.81 | 0.028 |
| P15018 | Leukemia inhibitory factor | 0.80 | 0.031 |
| P24387 | Corticotropin-releasing factor-binding protein | 0.80 | 0.002 |
| Q9NZP8 | Complement C1r subcomponent-like protein | 0.79 | 0.020 |
| P15692 | Vascular endothelial growth factor A | 0.79 | 0.092 |
| P51659 | Peroxisomal multifunctional enzyme type 2 | 0.79 | 0.059 |
| Q13103 | Secreted phosphoprotein 24 | 0.79 | 0.014 |
| P07360 | Complement component C8 gamma chain | 0.79 | 0.025 |
| P10721 | Mast/stem cell growth factor receptor | 0.79 | 0.003 |
| O95865 | N(G),N(G)-dimethylarginine dimethylaminohydrolase 2 | 0.78 | 0.098 |
| Q9NUL5 | Shiftless antiviral inhibitor of ribosomal frameshifting protein | 0.78 | 0.026 |
| P01008 | antithrombin-III | 0.78 | 0.018 |
| P02746 | Complement C1q subcomponent subunit B | 0.77 | 0.019 |
| Q9HD89 | Resistin | 0.77 | 0.064 |
| P18065 | Insulin-like growth factor-binding protein 2 | 0.76 | 0.013 |
| P05155 | Plasma protease C1 inhibitor | 0.75 | 0.031 |
| P14061 | 17-beta-hydroxysteroid dehydrogenase type 1 | 0.74 | 0.017 |
| P50991 | T-complex protein 1 subunit delta | 0.74 | 0.042 |
| Q6IB04 | placenta growth factor | 0.69 | 0.001 |
| O75882 | Isoform 1 of Attractin | 0.67 | 0.005 |
| Q13219 | Pappalysin-1 | 0.44 | 0.034 |

Differentially expressed proteins with a fold change ≥1.1 (up-regulated or down-regulated) between the two groups and the P-value ≤ 0.1. 82 serum proteins were increased, and 67 were reduced in pre-GH compared with controls.
